1 **Liberation from equations: An equation-free method reveals the ecological interaction networks**  
2 **within complex microbial ecosystems**

3  
4 \*Kenta Suzuki<sup>1</sup>, Katsuhiko Yoshida<sup>1</sup>, Yumiko Nakanishi<sup>2,3</sup> and Shinji Fukuda<sup>2,4</sup>

5  
6 <sup>1</sup>Biodiversity Conservation Planning Section, Center for Environmental Biology and Ecosystem  
7 Studies, National Institute for Environmental Studies, 16-2 Onogawa, Tsukuba, Ibaraki, 305-8506  
8 Japan.

9 <sup>2</sup>Institute for Advanced Biosciences, Keio University, 246-2 Mizukami, Kakuganji, Tsuruoka,  
10 Yamagata 997-0052, Japan

11 <sup>3</sup>RIKEN Center for Integrative Medical Sciences, 1-7-22 Suehiro-cho, Tsurumi-ku, Yokohama,  
12 Kanagawa 230-0045, Japan

13 <sup>4</sup>PREST, Japan Science and Technology Agency, 4-1-8 Honcho Kawaguchi, Saitama 332-0012, Japan  
14

15 \*Corresponding author: Kenta Suzuki

16 Tel.: +81-029-850-2747

17 E-mail: [suzuki.kenta@nies.go.jp](mailto:suzuki.kenta@nies.go.jp)

18  
19 **Abstract**

20 Mapping the network of ecological interactions is key to understanding the composition, stability,  
21 function and dynamics of microbial communities. These ecosystem properties provide the  
22 mechanistic basis for understanding and designing microbial treatments that attempt to promote  
23 human health and provide environmental services. In recent years various approaches have been  
24 used to reveal microbial interaction networks, inferred from metagenomic sequencing data using  
25 time-series analysis, machine learning and statistical techniques. Despite these efforts it is still not  
26 possible to capture details of the ecological interactions behind complex microbial dynamics. Here,  
27 we develop the sparse S-map method (SSM), which generates a sparse interaction network from a  
28 multivariate ecological time-series without presuming any mathematical formulation for the  
29 underlying microbial processes. We show that this method outperforms a comparative equation-  
30 based method and that the results were robust to the range of observational errors and quantity of  
31 data that we tested. We then applied the method to the microbiome data of six mice and found that  
32 the mice had similar interaction networks when they were middle- to old-aged (36-72 week-old),  
33 characterized by the high connectivity of an unclassified Clostridiales. However, there was almost  
34 no shared network patterns when they were young- to middle-aged (4-36 week-old). The results  
35 shed light on the universality of microbial interactions during the lifelong dynamics of mouse gut-  
36 microbiota. The complexity of microbial relationships impede detailed equation-based modeling, and  
37 our method provides a powerful alternative framework to infer ecological interaction networks of  
38 microbial communities in various environments.  
39

## 40 **Introduction**

41 Microbial communities contribute to the evolutionary fitness of other living organisms by inhabiting  
42 their bodies (Mueller and Sachs 2015) and surroundings (Panke-Buisse et al. 2015, Heederik and  
43 von Mutius 2012, Chaparro et al. 2012). For example, the gut microbiota assists host metabolism  
44 (Sommer and Bäckhed 2013, Tremaroli and Bäckhed 2012) and provides defense against pathogens  
45 (Kamada et al. 2013). This understanding has motivated the development of microbial medicinal  
46 interventions that attempt to treat various disorders through the manipulation and control of  
47 microbial communities (Borody and Khoruts 2012). Furthermore, an emergent property of the  
48 microbial community is the potential contribution to environmental remediation through the  
49 degradation of pollutants (Iranzo et al. 2001, Swenson et al. 2000). The composition, stability,  
50 function and dynamics of a microbial community provides the mechanistic basis for these microbial  
51 treatments, and closer ties between these ecosystem properties and ecological interaction networks  
52 (interaction webs) have been revealed (Tylianakis et al. 2010). Hence, an understanding of ecological  
53 interaction networks is crucial for both human health and environmental sustainability. While it is  
54 difficult to study complex microbial interactions using traditional laboratory cultivation approaches,  
55 recent developments in next generation sequencing technology and high performance computing  
56 environments have enabled various approaches for revealing ecological interaction networks,  
57 ranging from time-series analysis, machine learning and statistical techniques (Vacher et al. 2016,  
58 Faust et al. 2015, Bucci and Xavier 2014, Faust and Raes 2012). However, there are currently no  
59 sufficiently effective methods for capturing details of ecological interactions within microbial  
60 communities, which frequently exhibit complex dynamics (Gerber 2014, Ravel et al. 2013, Pepper  
61 and Rosenfeld 2012, Relman 2012, Caporaso et al. 2011, Dethlefsen and Relman 2011).

62  
63 An ecological interaction network is defined as a directed network that describes interactions  
64 between organisms, such as mutualisms, competition and antagonistic (predator-prey) interactions  
65 (Faust and Raes 2012, Morin 2009). An ecological interaction network is generally described as a  
66 pairwise interaction matrix whose elements take zero, positive or negative values with regard to the  
67 effect of one species on the other. Here, we summarize the ties between ecological interaction  
68 networks and other ecosystem properties in three main points. First, the stability of an ecological  
69 system relies on its ecological interaction network, as is known from the seminal work of May (1973)  
70 that formulated how the stability of an ecological system relates to the density and strength of its  
71 ecological interactions. In microbial communities in particular, mutualistic interactions may have a  
72 disruptive effect on community stability (Coyte et al. 2015). Second, there are extensive studies  
73 suggesting that an interaction network is crucial to the development and maintenance of microbial  
74 ecosystem functions (reviewed by Vacher et al. 2016). For example, findings from a type of artificial  
75 selection experiment led Blouin et al. (2015) to suggest that reducing interaction richness is crucial  
76 to developing and maintaining microbial ecosystem function in terms of low CO<sub>2</sub> emission. Third, an  
77 ecological interaction network can be used to identify key species having significant effects on the  
78 stability and/or function of ecological systems out of proportion to their abundance (Jordan 2009,

79 Power et al. 1996, Paine 1969). For example, Jordan (1999) proposed a “keystone index” that  
80 identifies key species based on their topological position within an interaction network, a-pioneering  
81 theoretical development underpinning recent microbial community studies (Toju 2016, Berry and  
82 Widder 2014).

83

84 An ecological *interaction* network is different from an ecological *association* network such as a  
85 correlation network (Friedman and Alm 2012) or co-occurrence network (Faust et al. 2012).  
86 Although correlations between time-series data are often used as a proxy for interactions between  
87 species, this is not a reliable method even if a strong correlation exists between two species (Fisher  
88 and Mehta 2014). A co-occurrence network only implies the presence of underlying ecological  
89 interactions, whereas it provides significant information regarding associations between microbial  
90 species (Vacher et al. 2016). As an alternative approach, algorithms have been developed to infer  
91 ecological interaction networks directly from microbial time-series (Bucci et al. 2016, Fisher and  
92 Mehta 2014, Jiang et al. 2013). However, these algorithms may not be applicable to the complex  
93 dynamics of microbial communities, which require the following algorithm properties. First, a time-  
94 series demonstrating non-equilibrium dynamics must be available because such dynamics are  
95 common in microbial interaction networks. There are many reasons for this, such as species  
96 interactions, environmental fluctuations, experimental perturbations, invasions and aging, and  
97 understanding the dynamics resulting from these processes is clearly an important goal. Second, a  
98 method that can capture microbial relationships without any presumption regarding their  
99 mathematical formulation (in other words, an equation free approach) is desirable. As claimed for  
100 ecological systems in general (Deyle et al. 2015), ecological interactions are often nonlinear, i.e., the  
101 effect of species X on Y is not simply proportional to the abundance of Y, and attempting to  
102 formulate all these relationships into mathematical functions is not realistic (Bashan et al. 2016,  
103 DeAngelis and Yurek 2015). This fact will reduce the reliability of approaches that assume *a priori*  
104 any underlying equation. Overcoming these obstacles will widen the applicability of network  
105 inference methods without losing their reliability, and will promote our understanding on microbial  
106 communities further.

107

108 We developed an algorithm, the Sparse S-Map method (SSM; Fig 1, see Materials and Methods),  
109 that satisfies the above requirements. This algorithm generates a sparse interaction network from a  
110 multivariate ecological time-series without assuming any particular underlying equation. Using  
111 simulated multispecies population dynamics, we compared the performance of SSM to a comparable  
112 equation-based method, sparse linear regression (SLR) to highlight the differences between  
113 equation-free and equation-based methods. The robustness of the SSM’s performance against  
114 observational error and dataset size was also tested. We then applied the SSM to the time-series of  
115 gut-microbiota taken from the faeces of six mice over 72 weeks. To harness data limitations (18 time  
116 points per mouse), we performed network inference by aggregating the data of five mice and  
117 selected the network that best explained the dynamics of the remaining sixth mouse. This was also

118 a cross-validation test for the universality of ecological interaction networks among mice.

119

## 120 **Result**

### 121 *Sparse S-map method*

122 The sparse S-map method (SSM) is an algorithm that executes a forward stepwise regression  
123 scheme with bootstrap aggregation (“bagging”) to calibrate species’ interaction topology, i.e. with  
124 which species a focal species interacts, for S-map (Dixon et al. 1999, Sugihara et al. 1996, Sugihara  
125 1994). In other words, the SSM is a data-oriented equation-free modelling approach (empirical  
126 dynamic modelling; Deyle et al. 2015, Ye et al. 2015, Deyle et al. 2013, Sugihara et al. 2012) for  
127 multispecies ecological dynamics whose interaction topology is unknown.

128

129 S-map is a locally weighted linear regression model used for the mechanistic prediction of complex  
130 ecological dynamics (Deyle et al. 2015). It is applicable to complex ecological dynamics without any  
131 limitation in the dynamic property of given data and requires no special effort in formulating the  
132 underlying species relationships into mathematical functions. However, so far it has only been  
133 applicable to ecological systems with a small number of species whose interaction topology is  
134 already known. By applying a forward stepwise regression with bootstrap aggregation, the SSM  
135 realizes the appropriate selection of the interaction topology for S-map so that S-map becomes most  
136 relevant for explaining a given set of data points. The ability of S-map to describe non-linear species  
137 relationships makes the selection of interacting species reliable.

138

139 The SSM is essentially a non-parametric method that does not require any additional effort to  
140 adjust parameters for the given data. Furthermore, owing to the forward stepwise scheme, it is  
141 applicable to both absolute and relative abundance data without special treatment (Fisher and  
142 Mehta 2014). Fisher and Mehta (2014) have already applied the forward stepwise scheme with  
143 bagging to a linear regression model and thus developed an algorithm inferring the sparse  
144 interaction matrix (sparse linear regression; SLR). However, because of the use of linear regression  
145 model, the authors limited the applicability of SLR to systems whose dynamics are close to  
146 equilibrium.

147

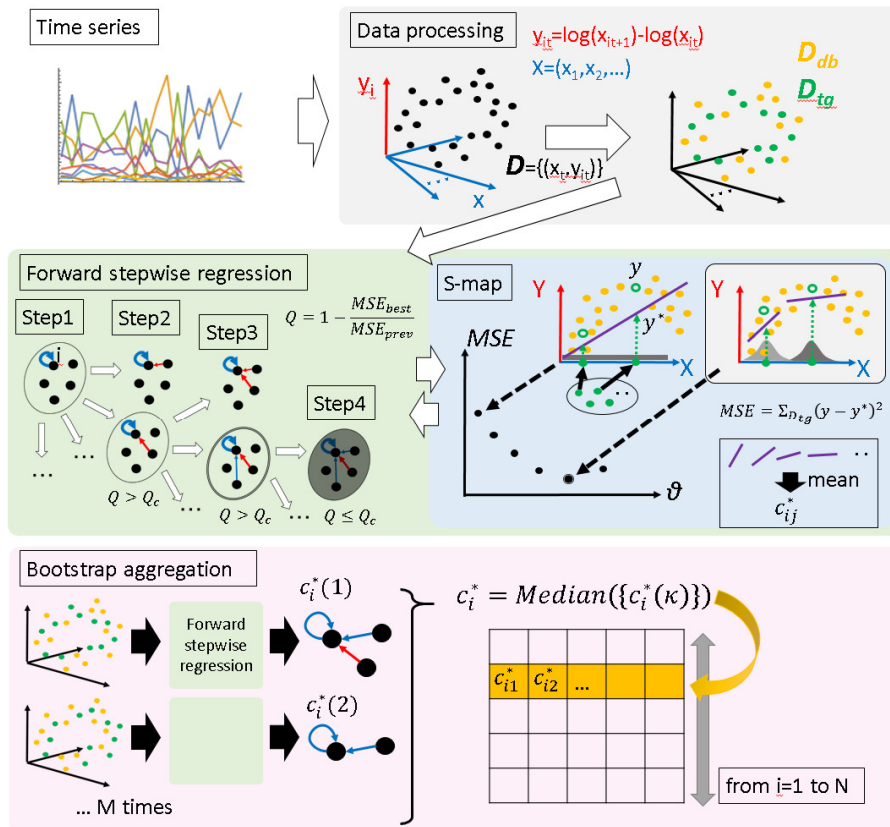

148

149 Figure 1. Overview of the sparse S-map method (SSM).

150

151

### 152 *Performance of the SSM*

153 To compare equation-free and comparative equation-based methods, we tested the performance of  
 154 the SSM and SLR for complex ecological dynamics generated from a generalized Lotka-Volterra  
 155 model with seven species with random interactions (see Materials and Methods). A significant  
 156 positive correlation ( $p < 0.01$ ) between inferred interaction strength and that of the true network  
 157 was found in both the SSM and SLR, although the SSM showed a stronger correlation than SLR  
 158 (Fig. 2ab). In both methods, the inferred strength was slightly greater than the actual interaction  
 159 strength because of the non-linear species relationships. However, the correlation between actual  
 160 and inferred interaction strengths assures their correspondence.

161

162 Two major performance criteria for network inference methods are sensitivity (the ratio of detected  
 163 interacting species pairs with respect to all interacting pairs) and specificity (the ratio of detected  
 164 non-interacting species pairs with respect to all non-interacting pairs). Furthermore, accuracy  
 165 (sensitivity times the ratio of interacting pairs plus specificity times the ratio of non-interacting  
 166 pairs) quantifies the overall performance of the method for discriminating interacting and non-  
 167 interacting pairs. Figure 2c shows that the mean accuracy of the SSM was approximately 72%, 10%  
 168 greater than that of SLR. The SSM had greater specificity than SLR, which compensated for its  
 169 lower sensitivity. This means that the SSM is more conservative than SLR in finding a link between

170 two species, which makes the SSM accurate than SLR.  
 171 Another important question is how reliable the detected interactions are. Hence, we also calculated  
 172 precision (the ratio of detected interacting species pairs that actually interact with respect to all  
 173 detected interacting pairs). The mean precision of the SSM was 62%, 10% greater than SLR. The  
 174 SSM thus outperformed SLR in both accuracy and precision. However, 62% precision means that  
 175 more than one third of the detected links are false. One remedy for this was obtained by introducing  
 176 a threshold value for accepting inferred interactions. For example, when filtering out interactions  
 177 whose inferred strength is less than three (approximately 40% of all detected interactions remain;  
 178 Fig.S1), the mean precision of the SSM exceeded 90%, whereas it was approximately 80% in SLR.  
 179

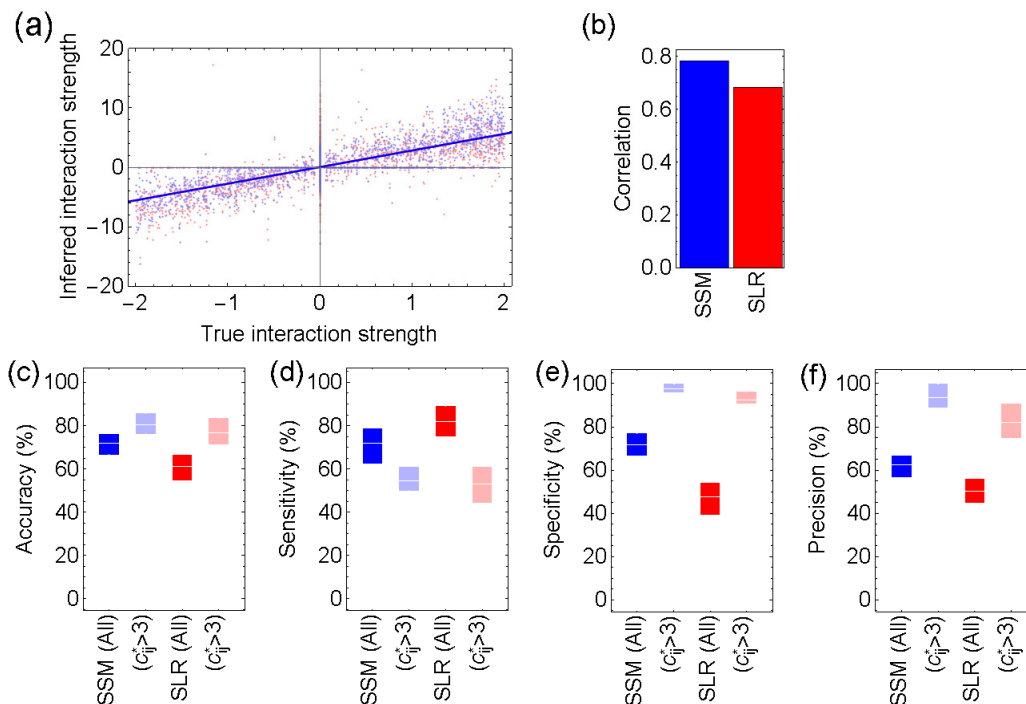

180  
 181 Figure 2. Performance of the SSM and SLR for simulated ecological dynamics. Scatter plot with  
 182 regression line (a), and correlation measured by Pearson's correlation coefficient (b). Points are  
 183 assembled from 100 network inference results for time-series with 100 data points sampled from  
 184 dynamics generated from a seven species GLV model with random species interactions. Accuracy (c),  
 185 sensitivity (d), specificity (e) and precision (f), is calculated separately for each of 100 trials for the  
 186 SSM and SLR, either including all interactions or after excluding inferred interactions whose  
 187 strength is less than three. Bars indicate the first and third quartiles, and the line indicates the  
 188 mean. All values are calculated after excluding intra-specific interactions.

189  
 190  
 191 *Robustness of the SSM for observational errors and data size*

192 Both mean accuracy and precision of the SSM outperformed SLR for all dataset sizes and  
 193 observational errors that we tested (Fig. 3). The mean accuracy and precision was robust against  
 194 increases in observational error because the increase in specificity compensated for the decrease in



195 sensitivity. The increase in dataset size from 25 to 100 points raised mean sensitivity by 20% in both  
196 the SSM and SLR, while it reduced mean precision by 7%. More importantly, it reduced mean  
197 accuracy by only 5% in the SSM but by 10% in SLR. Thus, increasing dataset size generally  
198 enhances both methods to detect more links, while this benefits the SSM more than SLR because its  
199 negative effect on accuracy is weaker in the SSM. The mean precision for inferred networks after  
200 excluding weak (less than three) interactions was over 90% in the SSM for the all dataset sizes and  
201 observational errors we tested (Fig.S2). In contrast to the cases when all interactions were  
202 considered, no negative effect on accuracy or precision was found in both methods. It should be  
203 noted that in figure 2S, among 100 trials, approximately 20% of the networks that were inferred  
204 from 50 data points and that the 40% of those inferred from 25 data points were not included  
205 because they had no inter-specific links.  
206

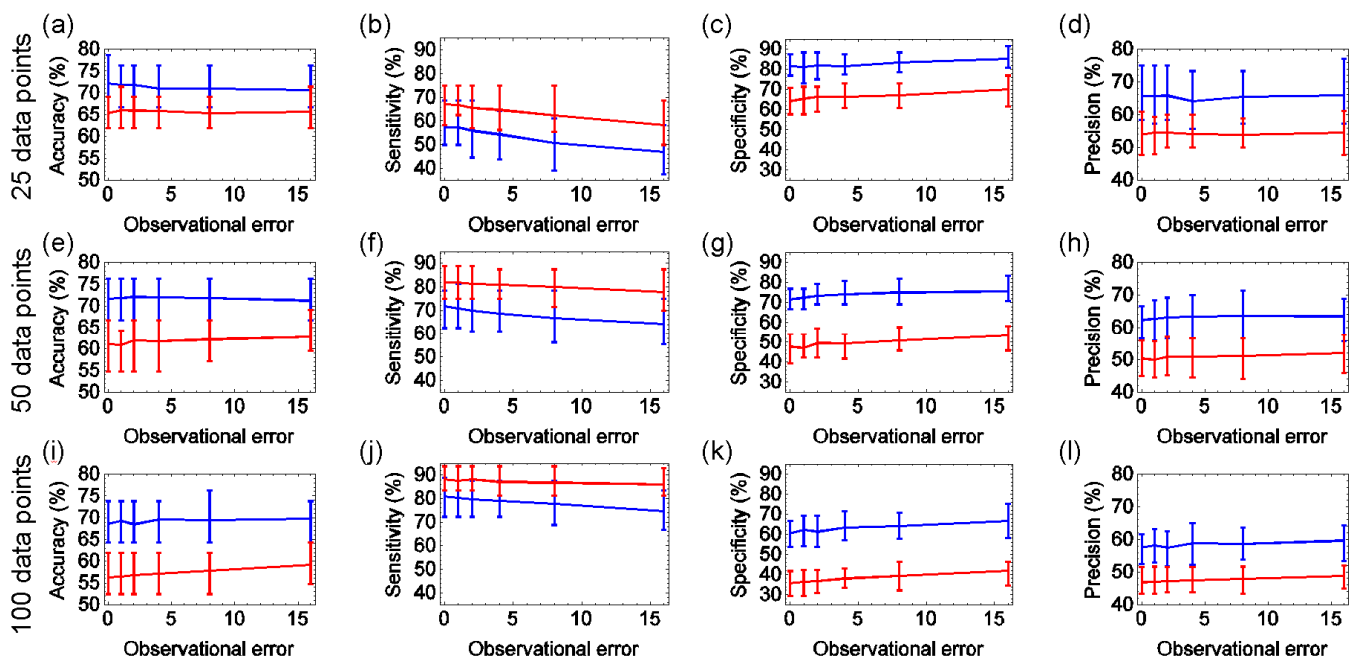

207  
208 Figure 3. Robustness of the SSM and SLR for observational errors and data size. Accuracy,  
209 sensitivity, specificity and precision for different observational errors were calculated for time-series  
210 with 25 data points (a-d), 50 data points (e-h) and 100 data points (i-l) sampled from simulated  
211 ecological dynamics. Blue lines indicate the SSM and red lines indicate SLR. Solid lines indicate the  
212 mean value and the error bars indicate the first and the third quartiles. All results are calculated  
213 from 100 different time-series generated from a seven species GLV model with random species  
214 interactions. All values are calculated after excluding intra-specific interactions.  
215  
216

### 217 *Application of the SSM to gut microbiome data*

218 We applied the SSM to the time-series data of gut-microbiota taken from the faeces of six male  
219 C57BL/6J mice ( $M_1$  to  $M_6$ ) which were maintained in a vinyl isolator over a 72 week period  
220 (Nakanishi et al. in prep., see Materials and Methods). Because only 18 data points were obtained

221 per mouse (sampled once every 4 weeks between 4 to 72 weeks of age), we performed network  
222 inference by aggregating the data of five mice and selected the network that best explained the  
223 dynamics of the remaining sixth mouse. We regard that network as the most relevant network. The  
224 most relevant networks are inferred using the 4-40 week and 36-72 week data points, considering  
225 the shift in community composition around the middle of mouse's aging processes (Nakanishi et al.  
226 in prep.). For the 4-40 week time-series data, the most relevant networks had small number of links  
227 (18 in total), and it was difficult to determine any characteristic patterns shared among mice (Fig.  
228 S3). In contrast, for the 36-72 week time-series, the most relevant networks had many links (52 in  
229 total), where 2.6 individuals on average shared any one link (Fig. 4). This was greater than the  
230 bootstrap 95% confidence level (2.5) calculated from the surrogate data. All links found within more  
231 than four mice (except for those included as "others") included an unclassified Clostridiales, that  
232 exhibited a positive relationship between *Allobaculum* and the Clostridiales, the positive effect from  
233 the Clostridiales to an unclassified S24-7 (*Bacteroides*) and a *Lactobacillus* to the Clostridiales and  
234 the negative effect from an unclassified Rikenellaceae to the Clostridiales.  
235

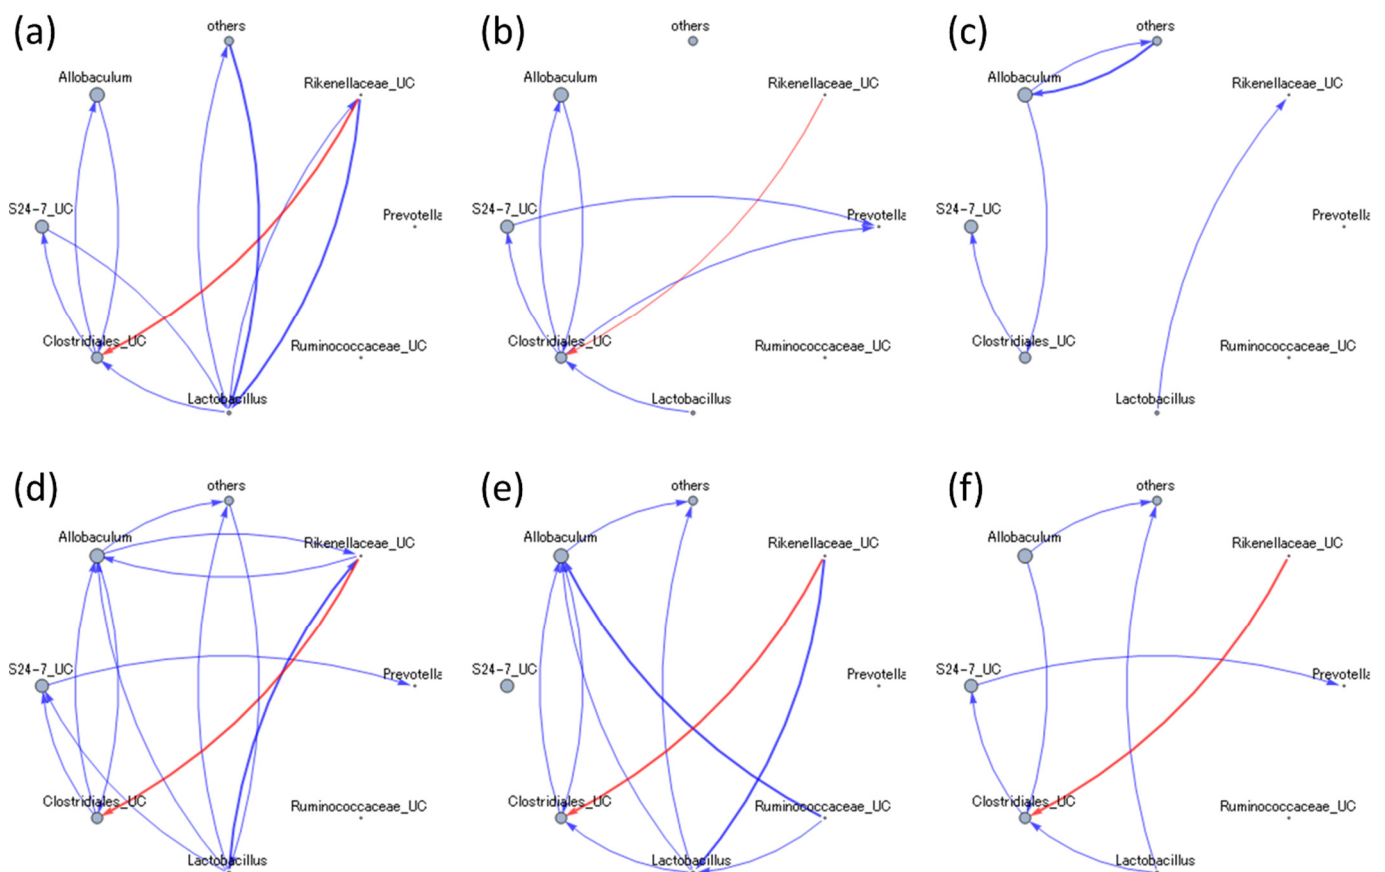

236

237 Figure 4. Interaction networks of six mice inferred by data points at 36-72 weeks of age. (a) to (f)  
238 corresponds to mouse M<sub>1</sub> to M<sub>6</sub>. Positive and negative effects are indicated by blue and red arrows  
239 respectively. The size of the nodes indicates the relative abundance. The thick arrows indicate the  
240 links whose strength is in the top 40% among all the links. Inter-specific links are not shown.



241

242

## 243 **Discussion**

244 We developed the sparse S-map method (SSM), an equation-free method used for inferring  
245 ecological interaction networks from a multivariate ecological time-series (Fig.1). Using simulated  
246 multispecies population dynamics, we compared the performance of the SSM to a comparable  
247 equation-based method, sparse linear regression (SLR), to highlight the differences between  
248 equation-free and equation-based methods when applied to complex microbial dynamics. The SSM  
249 outperformed SLR in both accuracy and precision, and showed particularly remarkable precision  
250 when weak (less than three) links are filtered out (Fig. 2). Furthermore, both mean accuracy and  
251 precision of the SSM outperformed that of SLR for all the dataset sizes and observational errors we  
252 tested (Fig. 3), with 90% mean precision when the weak links are filtered out (Fig S2). As an  
253 equation-free method, the SSM has greater ability to determine species interactions in complex  
254 ecological dynamics than the comparative equation-based method, and the performance is robust  
255 against observational errors. It is worth noting that increases in the dataset size raised the  
256 sensitivity of both methods (Fig 3.b,f,j) and the number of networks that contain strong links (Fig.  
257 2S), but might not affect accuracy and precision in general.

258

259 We then applied the SSM to the time-series of gut-microbiota taken from the faeces of six mice.  
260 Here, the procedure of applying the SSM to mouse gut microbiota can be regarded as a cross-  
261 validation test for the universality of the interaction network among mice. Our results suggested  
262 that in the middle to old age (36-72 weeks old), the mice had similar interaction networks, which  
263 were characterized by the high connectivity of an unclassified Clostridiales. However, in the young  
264 to middle age (4-40 weeks old), there was almost no network pattern common among mice. Hence,  
265 the result validates universality in the interaction network only in the latter half of the lifelong  
266 dynamics of mouse gut microbiota. This might be due to transitivity of microbial interactions during  
267 the development of physiological and immunological functions as well as that of the development of  
268 the gut microbiota itself. Recently, Odamaki et al. (2016) showed the age related compositional  
269 shifts in human gut microbiota. We anticipate that applying SSM to human subjects in different age  
270 groups will offer deeper insights into how the human gut microbiota shaped through its lifelong  
271 developmental processes.

272

273 While we adapted a Holling Type III functional response identically to all species relationships in  
274 the simulation, a variety of processes will be the source of non-linear species relationships in  
275 empirical microbial communities. The complex interdependency of metabolism (Baran et al. 2015),  
276 inter specific competition (Hibbing et al. 2010), intercellular signaling such as quorum sensing  
277 (Atkinson and Williams 2009), formation of multi-species complexes known as biofilms (Stoodley et  
278 al. 2002), and evolutionary processes running concurrently to ecological processes (Gomez et al.  
279 2016) might all contribute to the mechanistic basis. The relative performance of the SSM to SLR

280 will depend on the ubiquity and strength of these processes. In this case, large non-linearity indices  
281 characterized the dynamics of mouse gut-microbiota (Fig. S4), indicating the effects of nonlinear  
282 relationships. Together with the performance of the SSM shown here, the need of equation-free  
283 approaches for the analysis of microbial dynamics is demonstrated.

284

285 In the near future, advances in metagenomic technology will further reduce the cost to collect time-  
286 series data and its output will be much more accurate and precise. One important question to ask is  
287 whether this will allow the replacement of equation-free approaches with equation-based  
288 approaches that utilize advanced modelling techniques (e.g., Brunton et al. 2016). There are two  
289 reasons why this seems improbable. First, the complex nature of microbial interactions we have  
290 described, even with such data, still present difficult challenges in formulating all the present  
291 relationships into mathematical formulations (De Angelis 2015, Perretti et al. 2013a, Perretti et al.  
292 2013b, Hartig and Dormann 2013). Second, a theoretical study proved that finding a precise  
293 dynamical equation for a time-series is, in general, computationally intractable even with any  
294 amount/quality of data (Cubitt et al. 2012). Conversely, these data advances would simply benefit  
295 our approach by promoting its ability to find links between species. In addition, Ye and Sugihara  
296 (2016) suggested a way to utilize high dimensionality of data to harness the predictive ability of  
297 equation-free forecasting. Thus, the future development of metagenome technologies would  
298 reinforce both the applicability and reliability of equation-free approaches and help improve our  
299 mechanistic understanding of microbial communities. We agree with DeAngelis et al. (2015), who  
300 stressed the value of equation-free approaches for the analysis of complex dynamical systems.

301

302

## 303 **Materials and Methods**

### 304 *Data processing*

305 We assume that time-series  $X = \{x(t)\}_{t=1}^L$  is an array of vectors  $x(t) = \{x_i(t)\}_{i=1}^N$  where  $t = 1, \dots, L$   
306 indicates data points with a constant interval (say 1 day),  $i = 1, \dots, N$  indicates species (OTUs) and  
307  $x_i(t)$  is the abundance of species. If  $x_i(t)$  is the relative abundance, then  $\sum_i x_i(t) = 1$ . However, we do  
308 not specify whether  $x_{it}$  is relative abundance or absolute abundance because our method is  
309 applicable to both cases. For convenience, we assume that  $X_i = \{x_i(t)\}_{t=1}^L$  is the time series of species  
310  $i$ . We also define a time series  $Y = \{y_i(t)\}_{t=1}^{L-1}$ , with  $y_i(t) = \log x_i(t+1) - \log x_i(t)$ , to apply gradient  
311 matching (Elnor et al. 2002), which assumes  $y_i(t)$  as the response variable and  $x_t$  as the  
312 explanatory variable. In the regression processes, the explanatory variables and the response  
313 variable having the same time index is treated as a pair  $(x(t), y_i(t))$ . We refer to the set of these  
314 pairs  $D = \{(x(t), y_i(t))\}_{t=1}^{L-1}$  as “data”.

315

### 316 *Bootstrap aggregation*

317 Because forward stepwise regression as explained below is known to be unstable, we used a  
318 bootstrap aggregation (“bagging”) method to obtain a stable result. To apply the bagging procedure,

319 half of the pairs in  $D$  are randomly sampled to make a “database”  $D_{db}$  and rest of the points are  
 320 assumed as a “target”  $D_{tg}$ . We use  $\bar{Y} = \{\bar{y}_i(t)\}$ ,  $\bar{X} = \{\bar{x}(t)\}$  and  $\bar{x}(t) = \{\bar{x}_i(t)\}$  when we need to  
 321 specifically indicate the points in  $D_{tg}$ . The process of forward stepwise regression is repeated  $\gamma_M$   
 322 times with different partitioning. Here, we set  $\gamma_M = 100$ .

323

### 324 *S-map*

325 S-maps is a locally weighted multivariate linear regression scheme that approximates the best local  
 326 linear model by giving greater weight to points on the attractor that are close to the current  
 327 ecosystem state. This approach does not require presupposed mathematical formalization of the  
 328 target dynamics, and thus regarded as an equation-free modeling approach (empirical dynamic  
 329 modelling; Deyle et al. 2015, Ye et al. 2015, Deyle et al. 2013, Sugihara et al. 2012).

330

#### 331 Algorithm 1: S-map

332 1. Initiate  $\theta = 0$ .

333 2. Select a pair  $(x(s), y_i(s))$  from  $D_{tg}$ .

334 3. Calculate weight vector by,

$$335 \quad w_s = \left\{ \exp \left( - \frac{\theta \|\bar{x}(s), x(k)\|}{d_s} \right) \right\}_{x(k) \in D_{db}},$$

336 where,

$$337 \quad d_s = \frac{1}{n} \sum_{x(k) \in D_{db}} \|\bar{x}_s, x_k\|.$$

338 Here,  $\|\cdot, \cdot\|$  denotes the Euclidian distance between two vectors and  $n = |D_{db}|$  is the number of  
 339 elements in  $D_{db}$ .

340 4. Generate a weighted design matrix as,

$$341 \quad A_s = \{w_{sk} x_k\}_{k=1}^n,$$

342 where  $w_{sk}$  is the  $k$ th element of  $w_s$ .

343 Similarly, generate a vector of weighted response variable as,

$$344 \quad B_s = \{w_{sk} y_i(k)\}_{k=1}^n.$$

345 5. Solve a linear equation

$$346 \quad B_s = A_s C_s,$$

347 as,

$$348 \quad C_s = A_s^{-1} B_s.$$

349 Here,  $A_s^{-1}$  is the pseudoinverse of  $A_s$ .

350 6. Prediction for  $\bar{y}_i(s)$  is obtained as,

$$351 \quad y_i^*(s) = C_s x(s).$$

352 7. Iterate 2-6 until all pairs in  $D_{tg}$  is selected. Then, calculate

$$353 \quad MSE_{new} = \frac{\sum_{\bar{y}_i(s) \in D_{tg}} (y_i^*(s) - \bar{y}_i(s))^2}{|D_{tg}|}.$$

354 8. If  $\theta = 0$ , or  $\theta \neq 0$  and  $MSE_{new} < MSE$  increment  $\theta$  by  $d\theta$ , set  $MSE = MSE_{new}$  and back to 2, else

355 return  $MSE$ .

356

357 The  $i$ th column of the inferred interaction matrix,  $c_i^* = \{c_{ij}^*\}_{j=1}^N$  is obtained by simply assuming that

$$358 \quad \tilde{c} = \frac{1}{n} \sum_{k=1}^n C_k,$$

359 and set  $c_{ij}^* = \tilde{c}(j)$  for  $j \in I_{\text{active}}$  and  $c_{ij}^* = 0$  otherwise. Here,  $\tilde{c}(j)$  represents the element of  $\tilde{c}$   
360 corresponding to the  $j$ th species in  $I_{\text{active}}$ . As explained in the next section,  $I_{\text{active}}$  is the set of the  
361 index of species whose interaction to species  $i$  is active (thus, non-zero).

362

363 The parameter  $\theta$  tunes how strongly the regression is localized to the region of state space around  
364 each  $\bar{x}_s$ . It is also used as an indicator for the degree of non-linearity of dynamics (Sugihara 1994).  
365 Note that if  $\theta = 0$ , the S-map model reduces to a vector auto-regression (VAR) model. Thus, S-maps  
366 include linear VAR models as a special case. More importantly, this also means that the SSM  
367 includes SLR as a special case. For  $\theta > 0$ , the elements of  $w_s$  can vary with the location in the state  
368 space in which  $(x, y_i)$  is plotted, and with increasing  $\theta$  they can vary more strongly for different  $\bar{x}$ .  
369 If  $\theta$  is too small, the coefficients will underestimate the true variability in interaction strength.  
370 However, with larger  $\theta$  the regression hinges on only the most proximal points on the manifold and  
371 will therefore be more sensitive to observation error. Here, we selected  $\theta$  that minimizes  $MSE$  by  
372 incrementing  $\theta$  from zero by  $d\theta = 0.2$  steps because as a function of  $\theta$ ,  $MSE$  generally has a global  
373 minima not very distant from zero (say,  $\theta < 10$ ). It is the simplest procedure for the minimization of  
374  $MSE$  adopted for explanation, and would be replaced by a more sophisticated method.

375

### 376 *Forward stepwise regression*

377 The use of forward stepwise regression is motivated by two reasons (Fisher and Mehta 2014). The  
378 first reason is that the forward stepwise selection can distinguish between the presence and absence  
379 of species interactions and include interactions only when it improves the predictive power of model.  
380 This makes inferred interaction networks sparse and easily interpretable. The second reason is that  
381 modern metagenomic techniques can only measure the relative abundances of microbes, not their  
382 absolute abundances. Hence, the design matrix for the linear regression becomes singular, and  
383 there exists no unique solution to the ordinary least squares problem. In the forward stepwise  
384 procedure interactions and species are added sequentially to the regression as long as they improve  
385 the predictive power of the model. Because the design matrix now only contains a sub-set of all  
386 possible species, it is never singular and the linear regression problem is well-defined. Below, we  
387 describe the forward stepwise regression including bootstrap aggregation. Since all of the  
388 regressions are performed independently for each species, we described the algorithm for a species,  
389 i.e. inferring a row of the interaction matrix ( $c_i^*$ ). The full interaction matrix is obtained by repeating  
390 the procedure from  $i = 1$  to  $N$ .

391

392 Algorithm 2: Forward stepwise regression with bootstrap aggregation

393 1. Set the target species  $i$ .

394 2. Initiate index  $\gamma = 1$ .

395 3. Sample half of the pairs in  $D$  to make  $D_{db}$ , and set the rest as  $D_{tg}$ .

396 4. The set of the index of explanatory variables (species) that have active interactions to species  $i$  is  
 397 initialized to  $I_{active} = \{i\}$  because the presence of intra-specific interaction is natural, and the  
 398 interaction with the rest of the species is unified as  $I_{inactive} = \{j\}_{j \neq i}$ .

399 5. A regression for  $y_i$  by  $\{x_k\}_{k \in I_{active}}$  is performed by S-map. This returns  $MSE_{prev}$ .

400 6. For each index  $j$  in  $I_{inactive}$ , create  $I_{test}^{(h)} = I_{active} \cup \{j\}$ , where the suffix  $h$  indicates that  $j$  is the  
 401  $h$ th element of  $I_{inactive}$ .

402 7. Perform a regression  $y_i$  by  $\{x_l\}_{l \in I_{test}^{(h)}}$  by S-map.

403 8. Repeat 7 to obtain  $MSE^{(h)}$  for all  $h$ .

404 8. Set the least  $MSE^{(h)}$  as  $MSE_{best}$  and  $I_{test}^{(h)}$  as  $I_{best}$ .

405 9. If  $Q = 1 - MSE_{prev}/MSE_{best}$  is greater than a pre-specified value ( $Q_c$ ) then set  $MSE_{best}$  as

406  $MSE_{prev}$  and  $I_{best}$  as  $I_{active}$ , remove  $h$ th element of  $I_{inactive}$  and go back to 6, otherwise go to 10.

407 10. Return  $c_i^*(\gamma)$  where  $\gamma$  indicates that the inferred interaction strength for species  $i$  is obtained  
 408 by the  $\gamma$ th iteration. If  $\gamma < \gamma_M$  increment  $\gamma_M$  by 1 and go back to 3, otherwise terminate the loop.

409 10. Return  $c_i^* = \text{Median}(\{c_i^*(\gamma)\}_{\gamma=1}^{\gamma_M})$ .

410

411  $Q_c$  controls the sensitivity of the algorithm to find links between species. It is reasonable to fix  $Q_c$   
 412 to zero because this means that a new link will be accepted as long as it improves  $MSE$ . Thus we  
 413 set  $Q_c$  to zero in both the SSM and SLR unless otherwise mentioned.

414

#### 415 *Simulation model*

416 We used a population dynamics model to generate the data set for validation. The model is based on  
 417 a generalized Lotka-Volterra equation (GLVE),

$$418 \quad \frac{dx}{dt} = x_i \{G(x_i) + \sum_{j=1}^N F_i(x_j)\},$$

419 (1)

420 which has been frequently used to model microbial population dynamics (Bucci et al. 2016, Coyte et  
 421 al. 2015, Fisher and Mehta 2014). Here,  $G(x_i) = r_i(1 - \sum_{i=1}^N x_i/K)$  and  $F_i(x_j) = c_{ij}x_j^2/(\beta + x_j^2)$ .  $F_i$  is  
 422 known as the Holling Type III functional response and introduces nonlinear species relationships.  $r_i$   
 423 is the intrinsic growth rate and  $K$  is the carrying capacity that defines upper limit of abundance.  
 424 Here, the metagenomic read count roughly corresponds to  $K$ .  $c_{ij}$  represents the effect of species  $j$   
 425 on  $i$ . Thus, the matrix  $C = \{c_{ij}\}$  expresses the “true” interaction between species except for where  
 426  $i = j$ , in which the effect of the first and second terms in (1) cannot be divided.  $\beta$  is the half-  
 427 saturation constant of the interspecific interaction and controls the strength of non-linearity within  
 428 the population dynamics.

429

430 To reduce the right hand side of equation (x), we used the relationship,

431 
$$\frac{1}{x} \frac{dx}{dt} = \frac{d \log x}{dt}.$$

432 Hence eq. (1) is transformed to,

433 
$$\frac{d \log x}{dt} = G(x_i) + \sum_{j=1}^N F_j(x_j).$$

434 (2)

435 The discrete nature of metagenomics data is captured by discretizing eq. (2) as,

436 
$$\log x_i(t + \Delta t) - \log x_i(t) = \{G(x_i) + \sum_{j=1}^N F_j(x_j)\} \Delta t.$$

437 By setting  $\Delta t = 1$  without loss of generality and introducing demographic stochasticity, we obtain  
438 the equation describing the population dynamics as,

439 
$$\log x_i(t + 1) = \log x_i(t) + G(x_i) + \sum_{j=1}^N F_j(x_j) + \eta_i(t) / \sqrt{x_i(t)}.$$

440 (3)

441 Here  $\eta_i(t)$  is a random value drawn from a normal distribution with mean 0 and variance  $\sigma^2$ .  $\sigma^2$   
442 determines the strength of stochasticity relative to the deterministic processes.

443

444 One can easily see that eq. (3) is transformed to,

445 
$$y_i(t) = \log x_i(t + 1) - \log x_i(t) = G(x_i) + \sum_{j=1}^N F_j(x_j) + \eta_i(t) / \sqrt{x_i(t)}.$$

446 (4)

447 This equation gives the true relationship between  $x$ 's and  $y_i$  when applying the regression test. It  
448 is worth noting that, although we specify  $G$  and  $F$  here, the SSM does not require  $F$  and  $G$  to be  
449 known or even described as a specific mathematical formulation. It should be noted that due to the  
450 form of  $F$  we adopted, the inferred interaction strength is roughly scaled as  $c_{ij}^* \sim c_{ij}/K$ . Hence we  
451 rescaled it as  $c_{ij}^* \rightarrow Kc_{ij}^*$ .

452

#### 453 *Data generation*

454 We used eq.(4) to generate ground truth data as follows. We generated the initial state as  $\{10^{\xi_i}\}_{i=1}^N$

455 where  $\xi_i$  is a random value drawn from a uniform distribution (0,4) and  $N$  is the number of  
456 species. The interaction matrix  $C$  is generated by the following rule; (1)  $C$  must have  $(N^2 - N)/2$   
457 non-zero elements, (2) value of a non-zero element is randomly assigned from a uniform distribution  
458  $(-2, -0.05)$  or  $(0.05, 2)$  and (3)  $c_{ji} \neq 0$  if  $c_{ij} \neq 0$ . With this initial state and interaction matrix, we  
459 numerically solved eq.(4) up to 5000 steps and took the latter 200, 100 or 50 steps. The numerical  
460 simulation was discarded if the abundance of at least one species fell below one; otherwise the result  
461 was sampled every 2 steps to make a time-series with 100, 50 or 25 data points.

462

463 Other parameter values were as follows. We set  $r = 1$  so that the scale of dynamics was relevant to  
464 the simulation of microbial dynamics observed as the time-series of 100, 50 and 25 data points.

465 Intra-specific competition ( $c_{ii} < 0$ ) was  $-0.4$ . This controlled the balance between stability and



466 instability. For example, a species does not coexist if  $c_{ii}$  is too large, while most communities  
467 converge to an equilibrium if  $c_{ii}$  is too small. The variance coefficient of process noise was set to  
468  $\sigma^2 = 0.04$ . This became a source of complexity within time-series data at a certain level.  $K$  was set  
469 to  $10^4$  considering the standard size of a metagenomic read count. Finally, we set  $\beta$  to  $0.05 \times K^2$  to  
470 introduce non-linear effects throughout the functional response. Because these values are for the  
471 specific Lotka-Volterra equation we used, except for two parameters ( $r$  and  $K$ ) specified by general  
472 criteria, discussion of whether the parameter values are valid for microbial systems or not is not  
473 important. Instead, the parameter values were adjusted so that the GLV model constantly  
474 generated dynamics that satisfied the acceptance criteria  $\theta > 1$ , because the relative performance of  
475 the SSM is in general higher than SLR if  $\theta$  deviates from zero. The Holling Type III functional  
476 response was also adapted because it reduces extinctions and non-persistent chaos in multispecies  
477 communities (Williams and Martinez 2004).

478

### 479 *Nonlinearity of time-series*

480 We evaluated the non-linearity of time-series by calculating  $\theta_i$  as follows.

481

482 Algorithm 3: Calculation of  $\theta_i$

- 483 1. Set the target species  $i$ .
- 484 2. Initiate index  $\gamma$  to 1.
- 485 3. Sample half of the pairs in  $D$  to make  $D_{db}$ , and set the rest to  $D_{tg}$ .
- 486 4. A regression for  $y_i$  by  $x$  is performed by S-map and set  $\theta$  that minimizes  $MSE$  as  $\theta_i^{(\gamma)}$  and  
487 increment  $\gamma$  by 1.
- 488 5. Back to 3 if  $\gamma < \gamma_m$ , otherwise terminate the loop.
- 489 6. Set the mean of  $\theta_i^{(\gamma)}$ 's to  $\theta_i$ .

490

491 Here, we set  $\gamma_m$  to 24. We accepted the time-series only if  $\text{Min}(\{\theta_i\}_{i=1}^N) > 1$  is satisfied.

492

### 493 *Observational error*

494 To simulate observational error, each abundance data  $x_i(t)$  was perturbed by a random value  
495 drawn from a normal distribution with mean zero and variance  $\varsigma x_i(t)$ . Here, we used six different  
496 values (0,1,2,4,8,16) for  $\varsigma$ .

497

### 498 *Application of the SSM to mouse microbiome data*

499 In the mouse gut microbiome data we used, OTUs were categorized into genus-level groups by the  
500 CLASSIFIER program of the Ribosomal Database Project (RDP) within a software package  
501 Quantitative Insights into Microbial Ecology (QIIME). For detailed description of this data set see  
502 Nakanishi et al. (in prep.). For our analysis, we picked the seven most abundant groups that  
503 comprise approximately 85% of the total microbial biomass and classified the abundance of the  
504 remaining groups into a single group of "others". Next,  $(x, y_i)$  was calculated for all mice and one

505 mouse ( $M_k$ ) selected as the test dataset. The remaining mice ( $\{M_l\}_{l \neq k}$ ) were used as the training  
506 data for cross validation which was aggregated to form dataset  $D$ . The SSM was performed on  $D$  as  
507 described above but instead of accepting the last step before  $Q_c$  exceeded zero,  $I_{\text{active}}$  of each step in  
508 a forward stepwise regression was stored for  $0.2 < Q_c < -0.2$ . Then, the value of  $I_{\text{active}}$  that  
509 minimizes the  $MSE$  of S-map predicting  $y_i$  from  $x$  in the test data was selected and  $c_i^*$  was  
510 calculated as per the explanation of S-map. The above procedure was repeated for all groups in  $k$  to  
511 form the  $M_k$ 's most relevant network.  $\theta_i$ 's values were also calculated for  $M_k$  using Algorithm 3  
512 (Fig. 4S).

513

#### 514 *Data accessibility*

515 The mouse gut microbiome data is available in the DDBJ database (<http://getentry.ddbj.nig.ac.jp/>)  
516 under accession number DRA004786. We used Mathematica 10.2 to implement the SSM and SLR,  
517 generate simulation data, process mouse gut microbiome data and to perform analysis. Computer  
518 codes (Mathematica notebook files) can be provided upon request to the authors.

519

520

521

522 **References**

- 523 1. Mueller, U. G., & Sachs, J. L. (2015). Engineering microbiomes to improve plant and animal  
524 health. *Trends in Microbiology*, 23(10), 606-617.
- 525 2. Panke-Buisse, K., Poole, A. C., Goodrich, J. K., Ley, R. E., & Kao-Kniffin, J. (2015). Selection on  
526 soil microbiomes reveals reproducible impacts on plant function. *The ISME journal*, 9(4), 980-989.
- 527 3. Heederik, D., & von Mutius, E. (2012). Does diversity of environmental microbial exposure matter  
528 for the occurrence of allergy and asthma? *Journal of Allergy and Clinical Immunology*, 130(1), 44-  
529 50.
- 530 4. Chaparro, J. M., Sheflin, A. M., Manter, D. K., & Vivanco, J. M. (2012). Manipulating the soil  
531 microbiome to increase soil health and plant fertility. *Biology and Fertility of Soils*, 48(5), 489-  
532 499.
- 533 5. Sommer, F., & Bäckhed, F. (2013). The gut microbiota—masters of host development and  
534 physiology. *Nature Reviews Microbiology*, 11(4), 227-238.
- 535 6. Tremaroli, V., & Bäckhed, F. (2012). Functional interactions between the gut microbiota and host  
536 metabolism. *Nature*, 489(7415), 242-249.
- 537 7. Kamada, N., Chen, G. Y., Inohara, N., & Núñez, G. (2013). Control of pathogens and pathobionts  
538 by the gut microbiota. *Nature Immunology*, 14(7), 685-690.
- 539 8. Borody, T. J., & Khoruts, A. (2012). Fecal microbiota transplantation and emerging applications.  
540 *Nature Reviews Gastroenterology and Hepatology*, 9(2), 88-96.
- 541 9. Iranzo, M., Sainz-Pardo, I., Boluda, R., Sanchez, J., & Mormeneo, S. (2001). The use of  
542 microorganisms in environmental remediation. *Annals of Microbiology*, 51(2), 135-144.
- 543 10. Swenson, W., Arendt, J., & Wilson, D. S. (2000). Artificial selection of microbial ecosystems for  
544 3 - chloroaniline biodegradation. *Environmental Microbiology*, 2(5), 564-571.
- 545 11. Tylianakis, J. M., Laliberté, E., Nielsen, A., & Bascompte, J. (2010). Conservation of species  
546 interaction networks. *Biological Conservation*, 143(10), 2270-2279.
- 547 12. Vacher, C., Tamaddon-Nezhad, A., Kamenova, S., Peyrard, N., Moalic, Y., Sabbadin, R., ... &  
548 Fievet, V. (2016). Chapter One: learning ecological networks from next-generation sequencing  
549 data. *Advances in Ecological Research*, 54, 1-39.
- 550 13. Faust, K., Lahti, L., Gonze, D., de Vos, W. M., & Raes, J. (2015). Metagenomics meets time series  
551 analysis: unraveling microbial community dynamics. *Current Opinion in Microbiology*, 25, 56-66.
- 552 14. Bucci, V., & Xavier, J. B. (2014). Towards predictive models of the human gut microbiome. *Journal*  
553 *of Molecular Biology*, 426(23), 3907-3916.
- 554 15. Faust, K., & Raes, J. (2012). Microbial interactions: from networks to models. *Nature Reviews*  
555 *Microbiology*, 10(8), 538-550.
- 556 16. Gerber, G. K. (2014). The dynamic microbiome. *FEBS letters*, 588(22), 4131-4139.
- 557 17. Ravel, J., Brotman, R. M., Gajer, P., Ma, B., Nandy, M., Fadrosh, D. W. & Hickey, R. J. (2013).  
558 Daily temporal dynamics of vaginal microbiota before, during and after episodes of bacterial  
559 vaginosis. *Microbiome*, 1(1), 1.
- 560 18. Pepper, J. W., & Rosenfeld, S. (2012). The emerging medical ecology of the human gut microbiome.

- 561 Trends in Ecology & Evolution, 27(7), 381-384.
- 562 19. Relman, D. A. (2012). The human microbiome: ecosystem resilience and health. Nutrition  
563 Reviews, 70(suppl 1), S2-S9.
- 564 20. Caporaso, J. G., Lauber, C. L., Costello, E. K., Berg-Lyons, D., Gonzalez, A., Stombaugh, J., ... &  
565 Gordon, J. I. (2011). Moving pictures of the human microbiome. Genome Biology, 12(5), 1.
- 566 21. Dethlefsen, L., & Relman, D. A. (2011). Incomplete recovery and individualized responses of the  
567 human distal gut microbiota to repeated antibiotic perturbation. Proceedings of the National  
568 Academy of Sciences USA, 108(Supplement 1), 4554-4561.
- 569 22. Morin, P. J. (2009). Community Ecology. John Wiley & Sons.
- 570 23. May, R. M. (1973). Stability and complexity in model ecosystems (Vol. 6). Princeton University  
571 Press.
- 572 24. Coyte, K. Z., Schluter, J., & Foster, K. R. (2015). The ecology of the microbiome: networks,  
573 competition, and stability. Science, 350(6261), 663-666.
- 574 25. Blouin, M., Karimi, B., Mathieu, J., & Lerch, T. Z. (2015). Levels and limits in artificial selection  
575 of communities. Ecology Letters, 18(10), 1040-1048.
- 576 26. Jordán, F. (2009). Keystone species and food webs. Philosophical Transactions of the Royal Society  
577 of London B: Biological Sciences, 364(1524), 1733-1741.
- 578 27. Power, M. E., Tilman, D., Estes, J. A., Menge, B. A., Bond, W. J., Mills, L. S., Daily G., Carlos, J.,  
579 Lubchenco, J. & Paine, R. T. (1996). Challenges in the quest for keystones. BioScience, 46(8), 609-  
580 620.
- 581 28. Paine, R. T. (1969). A note on trophic complexity and community stability. American Naturalist,  
582 103(929), 91-93.
- 583 29. Jordán, F., Takács-Sánta, A., & Molnár, I. (1999). A reliability theoretical quest for keystones.  
584 Oikos 86, 453-462.
- 585 30. Toju, H., Yamamoto, S., Tanabe, A. S., Hayakawa, T., & Ishii, H. S. (2016). Network modules and  
586 hubs in plant-root fungal biomes. Journal of The Royal Society Interface, 13(116), 20151097.
- 587 31. Berry, D., & Widder, S. (2014). Deciphering microbial interactions and detecting keystone species  
588 with co-occurrence networks. Frontiers in Microbiology, 5, 219.
- 589 32. Friedman, J., & Alm, E. J. (2012). Inferring correlation networks from genomic survey data. PLoS  
590 Computational Biology, 8(9), e1002687.
- 591 33. Fisher, C. K., & Mehta, P. (2014). Identifying keystone species in the human gut microbiome from  
592 metagenomic timeseries using sparse linear regression. PLoS One, 9(7), e102451.
- 593 34. Bucci, V., Tzen, B., Li, N., Simmons, M., Tanoue, T., Bogart, E., Deng, L., Yeliseyev, V., Delaney,  
594 M. L., Liu, Q., Olle, B., Stein, R. R., Honda, K., Bry, L. & Gerber, G. K. (2016). MDSINE: Microbial  
595 Dynamical Systems INference Engine for microbiome time-series analyses. Genome biology, 17(1),  
596 1.
- 597 35. Jiang, X., Hu, X., Xu, W., Li, G., & Wang, Y. (2013). Inference of microbial interactions from time  
598 series data using vector autoregression model. In Bioinformatics and Biomedicine (BIBM), 2013  
599 IEEE International Conference on (pp. 82-85). IEEE.

- 600 36. Deyle, E. R., May, R. M., Munch, S. B., & Sugihara, G. (2016). Tracking and forecasting ecosystem  
601 interactions in real time. *Proceedings of the Royal Society of London B Biological Sciences* (Vol.  
602 283, No. 1822, p. 20152258)
- 603 37. Bashan, A., Gibson, T. E., Friedman, J., Carey, V. J., Weiss, S. T., Hohmann, E. L., & Liu, Y. Y.  
604 (2016). Universality of human microbial dynamics. *Nature*, 534(7606), 259-262.
- 605 38. DeAngelis, D. L., & Yurek, S. (2015). Equation-free modeling unravels the behavior of complex  
606 ecological systems. *Proceedings of the National Academy of Sciences USA*, 112(13), 3856-3857.
- 607 39. Dixon, P. A., Milicich, M. J., & Sugihara, G. (1999). Episodic fluctuations in larval supply. *Science*,  
608 283(5407), 1528-1530.
- 609 40. Sugihara, G., Allan, W., Sobel, D., & Allan, K. D. (1996). Nonlinear control of heart rate variability  
610 in human infants. *Proceedings of the National Academy of Sciences USA*, 93(6), 2608-2613.
- 611 41. Sugihara, G. (1994). Nonlinear forecasting for the classification of natural time series.  
612 *Philosophical Transactions of the Royal Society of London A: Mathematical, Physical and*  
613 *Engineering Sciences*, 348(1688), 477-495.
- 614 42. Nakanishi, Y., Nozu, R., Ueno, M., Hioki, K., Ishi, C., Murakami, S., Suzuki, K., Ka, Y., Ogura, T.,  
615 Ito, A., Tachibana, N., Hirayama, A., Sugimoto, M., Ohno, H., Soga, T., Ito, M., Tomita, M., &  
616 Fukuda, S., Aging-related alterations of the murine intestinal environment induce an obese-type  
617 gut dysbiosis, in preparation.
- 618 43. Baran, R., Brodie, E. L., Mayberry-Lewis, J., Hummel, E., Da Rocha, U. N., Chakraborty, R., ...  
619 & Northen, T. R. (2015). Exometabolite niche partitioning among sympatric soil bacteria. *Nature*  
620 *Communications*, 6.
- 621 44. Ghoul, M., & Mitri, S. (2016). The Ecology and Evolution of Microbial Competition. *Trends in*  
622 *Microbiology*, 24(1), 833-845.
- 623 45. Stoodley, P., Sauer, K., Davies, D. G., & Costerton, J. W. (2002). Biofilms as complex differentiated  
624 communities. *Annual Reviews in Microbiology*, 56(1), 187-209.
- 625 46. Hibbing, M. E., Fuqua, C., Parsek, M. R., & Peterson, S. B. (2010). Bacterial competition:  
626 surviving and thriving in the microbial jungle. *Nature Reviews Microbiology*, 8(1), 15-25.
- 627 47. Gómez, P., Paterson, S., De Meester, L., Liu, X., Lenzi, L., Sharma, M. D., Kerensa, M. & Buckling,  
628 A. (2016). Local adaptation of a bacterium is as important as its presence in structuring a natural  
629 microbial community. *Nature Communications* 7, 12453.
- 630 48. Brunton, S. L., Proctor, J. L., & Kutz, J. N. (2016). Discovering governing equations from data by  
631 sparse identification of nonlinear dynamical systems. *Proceedings of the National Academy of*  
632 *Sciences USA*, 113(15), 3932-3937.
- 633 49. Hartig, F., & Dormann, C. F. (2013). Does model-free forecasting really outperform the true  
634 model?. *Proceedings of the National Academy of Sciences USA*, 110(42), E3975-E3975.
- 635 50. Perretti, C. T., Munch, S. B., & Sugihara, G. (2013). Model-free forecasting outperforms the  
636 correct mechanistic model for simulated and experimental data. *Proceedings of the National*  
637 *Academy of Sciences USA*, 110(13), 5253-5257.
- 638 51. Perretti, C. T., Munch, S. B., & Sugihara, G. (2013). Reply to Hartig and Dormann: the true model

- 639 myth. Proceedings of the National Academy of Sciences USA, 110(42), E3976-E3977.
- 640 52. Cubitt, T. S., Eisert, J., & Wolf, M. M. (2012). Extracting dynamical equations from experimental  
641 data is NP hard. Physical Review Letters, 108(12), 120503.
- 642 53. Ye, H., & Sugihara, G. (2016). Information leverage in interconnected ecosystems: Overcoming  
643 the curse of dimensionality. Science, 353(6302), 922-925.
- 644 54. Ellner, S. P., Seifu, Y., & Smith, R. H. (2002). Fitting population dynamic models to time-series  
645 data by gradient matching. Ecology, 83(8), 2256-2270.
- 646 55. Williams, R. J., & Martinez, N. D. (2004). Stabilization of chaotic and non-permanent food-web  
647 dynamics. The European Physical Journal B-Condensed Matter and Complex Systems, 38(2),  
648 297-303.

649

650

651 **Author contributions**

652 K.S. conceived and designed the project, developed the SSM, performed numerical simulations and  
653 analyzed all the real data. All authors analyzed the results, wrote the manuscript and approved the  
654 final version of the manuscript.

655

656

657



658 **Supplementary figures**

659

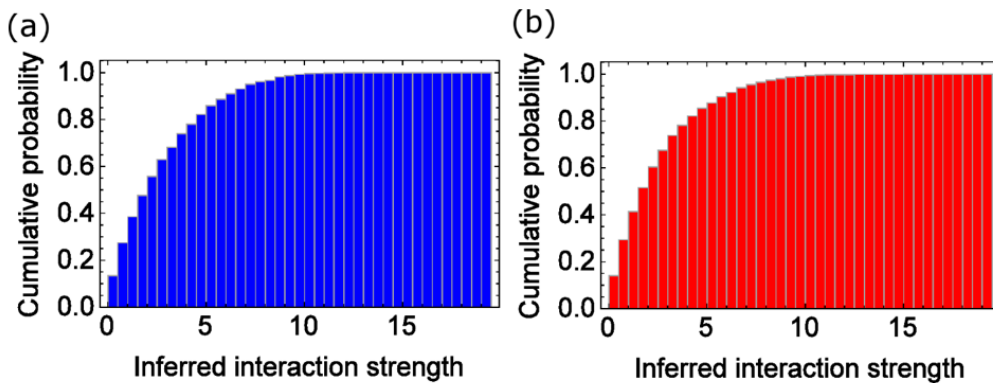

660

661 Figure S1. Cumulative distribution of inferred interaction strength in figure 2a for SSM (a) and  
662 SLR (b).

663

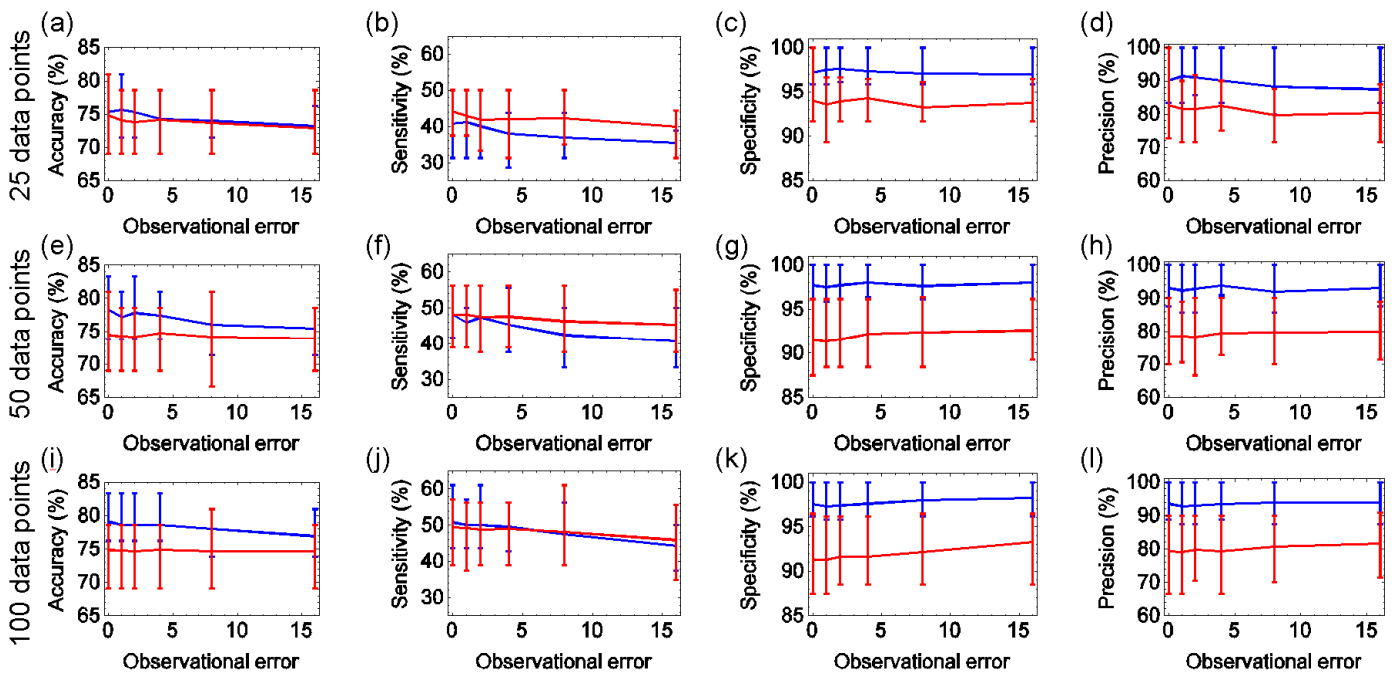

664

665 Figure S2. Robustness of SSM and SLR for observational errors and data size for networks where  
666 weak (fewer than three) inferred interactions are filtered out from the results of figure 3. Accuracy,  
667 sensitivity, specificity and precision for different observational errors were calculated for time-series  
668 with 25 data points (a-d), 50 data points (e-h) and 100 data points (i-l) sampled from simulated  
669 ecological dynamics. Blue lines indicates SSM and red lines indicate SLR. Solid lines indicate the  
670 mean value and the error bars indicate the first and the third quartiles. Among 100 trials, about  
671 20% of the networks inferred by 50 data points and 40% of that of 25 data points were not included  
672 because they had no inter-specific links.

673

674

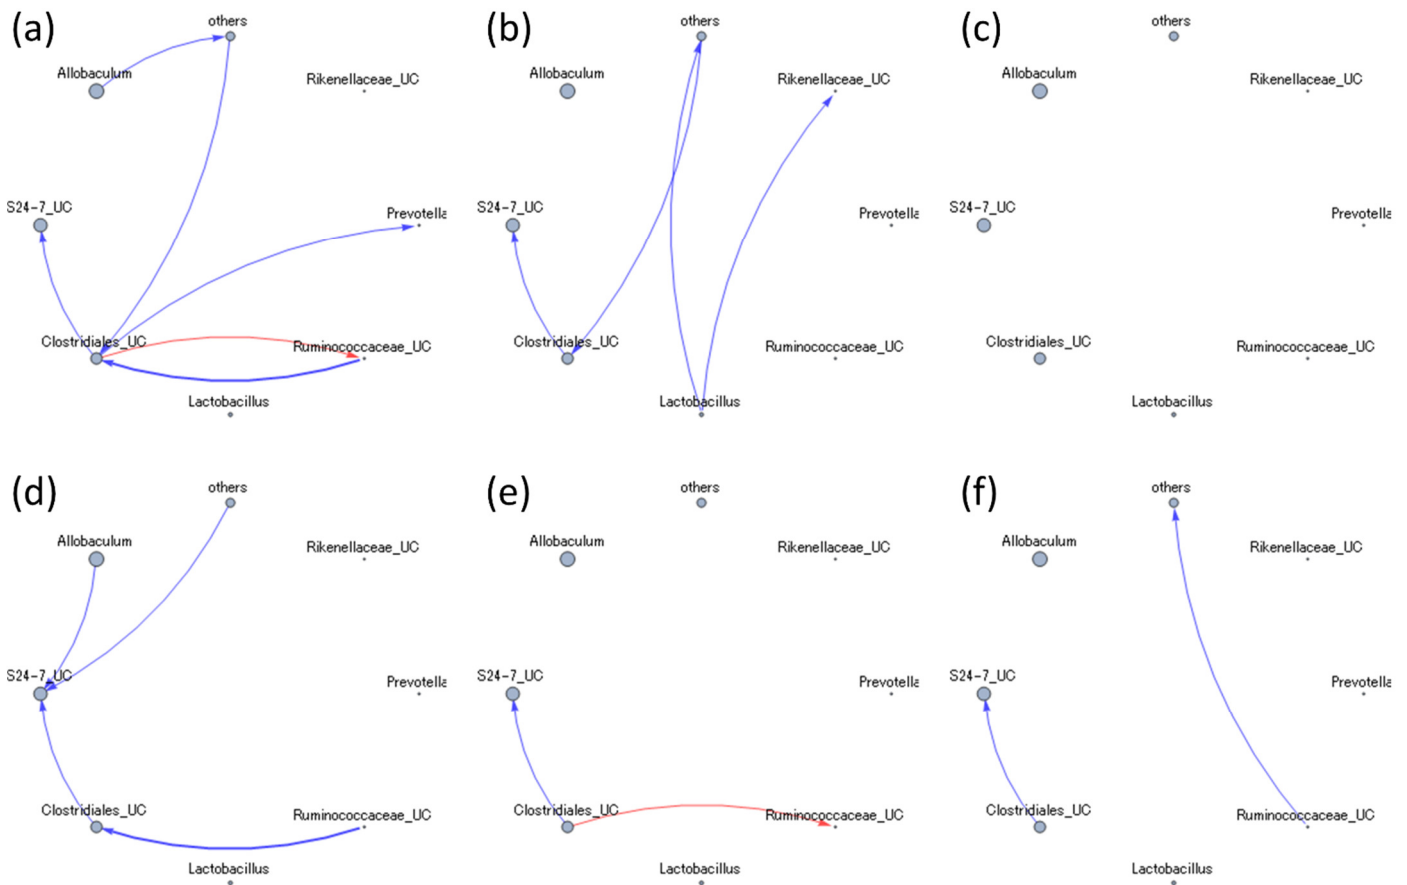

675

676 Fig. S3. Interaction networks of six mice inferred by 4-40 weeks old (a-f). Positive and negative  
 677 effects are indicated by blue and red arrows respectively. The size of nodes indicates relative  
 678 abundance. Inter-specific links are excluded.

679

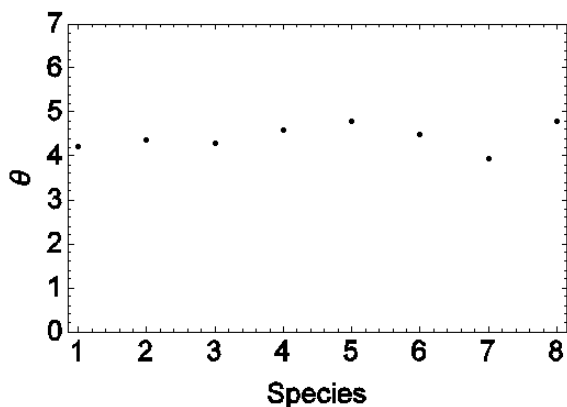

680

681 Fig. S4.  $\theta_i$  of  $M_1$  calculated for all (18) data points. Indices 1-8 corresponds to, *Allobaculum*, *S24-7*,  
 682 *Clostridiales*, *Lactobacillus*, *Ruminococcaceae*, *Prevotella*, and *others*, respectively.  $\theta_i$ s are not  
 683 significantly different for other mice.
